# Supplementary material for: Biphasic silicon oxide nanocomposites as high-performance lithium storage materials
Source: Royal Society of Chemistry journal article supplement (doi:10.1039/c9ta04493k), 2019-01-01
Supplement: c9ta04493k1.pdf [file c9ta04493k1.pdf]

†*Electronic Supplementary Information (ESI)*

# Biphasic Silicon Oxide Nanocomposites as High- Performance Lithium Storage Materials

Eunjun Park,<sup>a</sup> Yeong Eun Kim,<sup>a</sup> Juhye Song,<sup>a</sup> Min-Sik Park,<sup>\*b</sup> and Hansu Kim<sup>\*a</sup>

<sup>a</sup> Department of Energy Engineering, Hanyang University, 222 Wangsimni-ro, Seongdong-gu,  
Seoul, 04763, Republic of Korea

<sup>b</sup> Department of Advanced Materials Engineering for Information and Electronics, Kyung  
Hee University, Yongin 17104, Republic of Korea

**Corresponding Author**

E-mail: [khansu@hanyang.ac.kr](mailto:khansu@hanyang.ac.kr). (H. Kim), [mspark@khu.ac.kr](mailto:mspark@khu.ac.kr) (M.-S. Park)

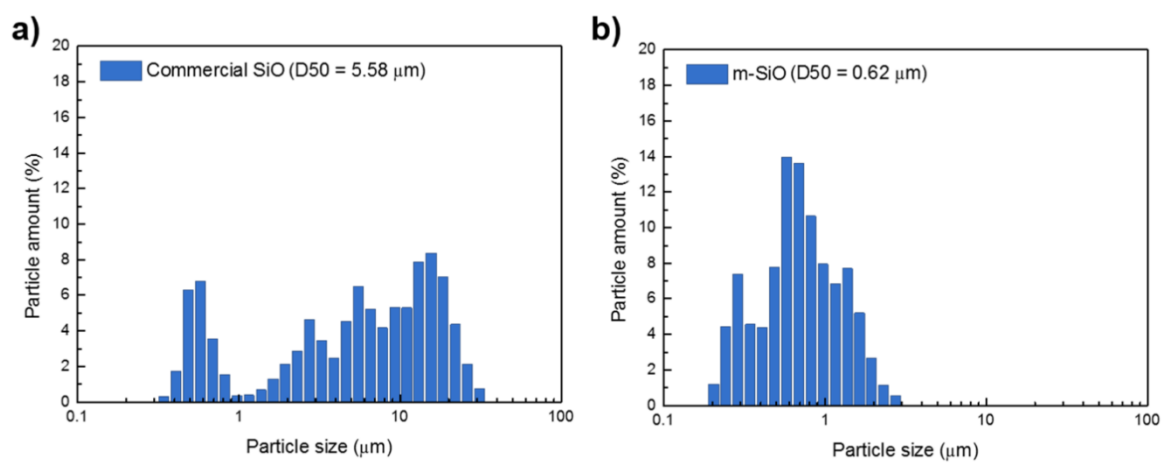

**Fig. S1** Particle size distribution of (a) commercial SiO and (b) m-SiO.

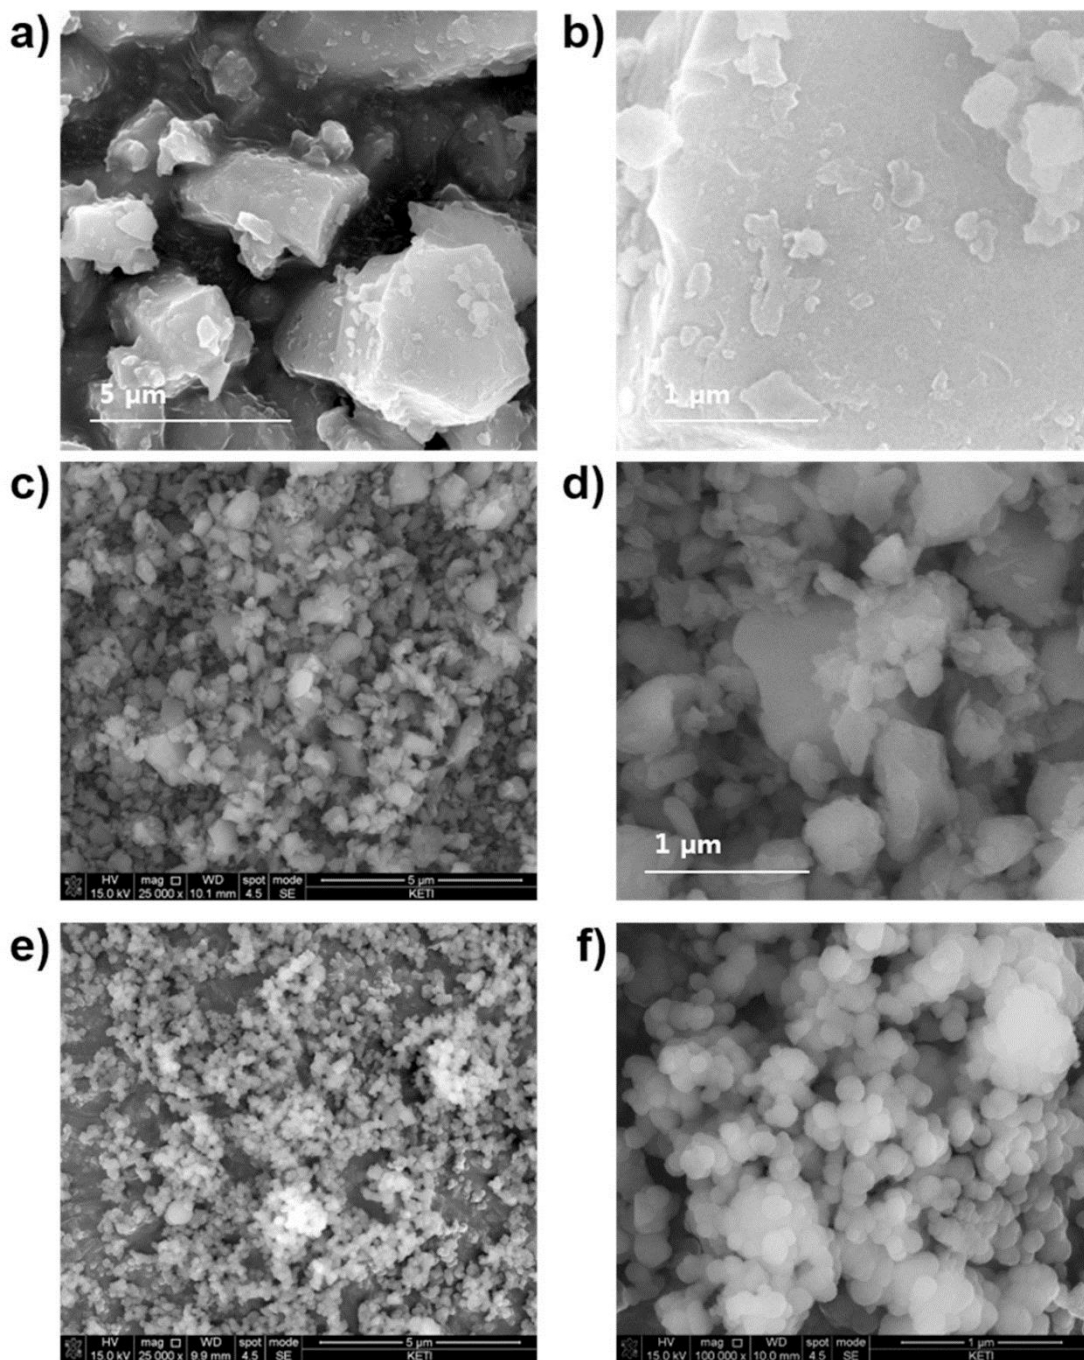

**Fig. S2** FESEM images of the SiO (core material) and Si/SiO<sub>x</sub> (shell material): (a,b) commercial SiO, (c,d) m-SiO, and (e,f) Si/SiO<sub>x</sub> nanospheres.

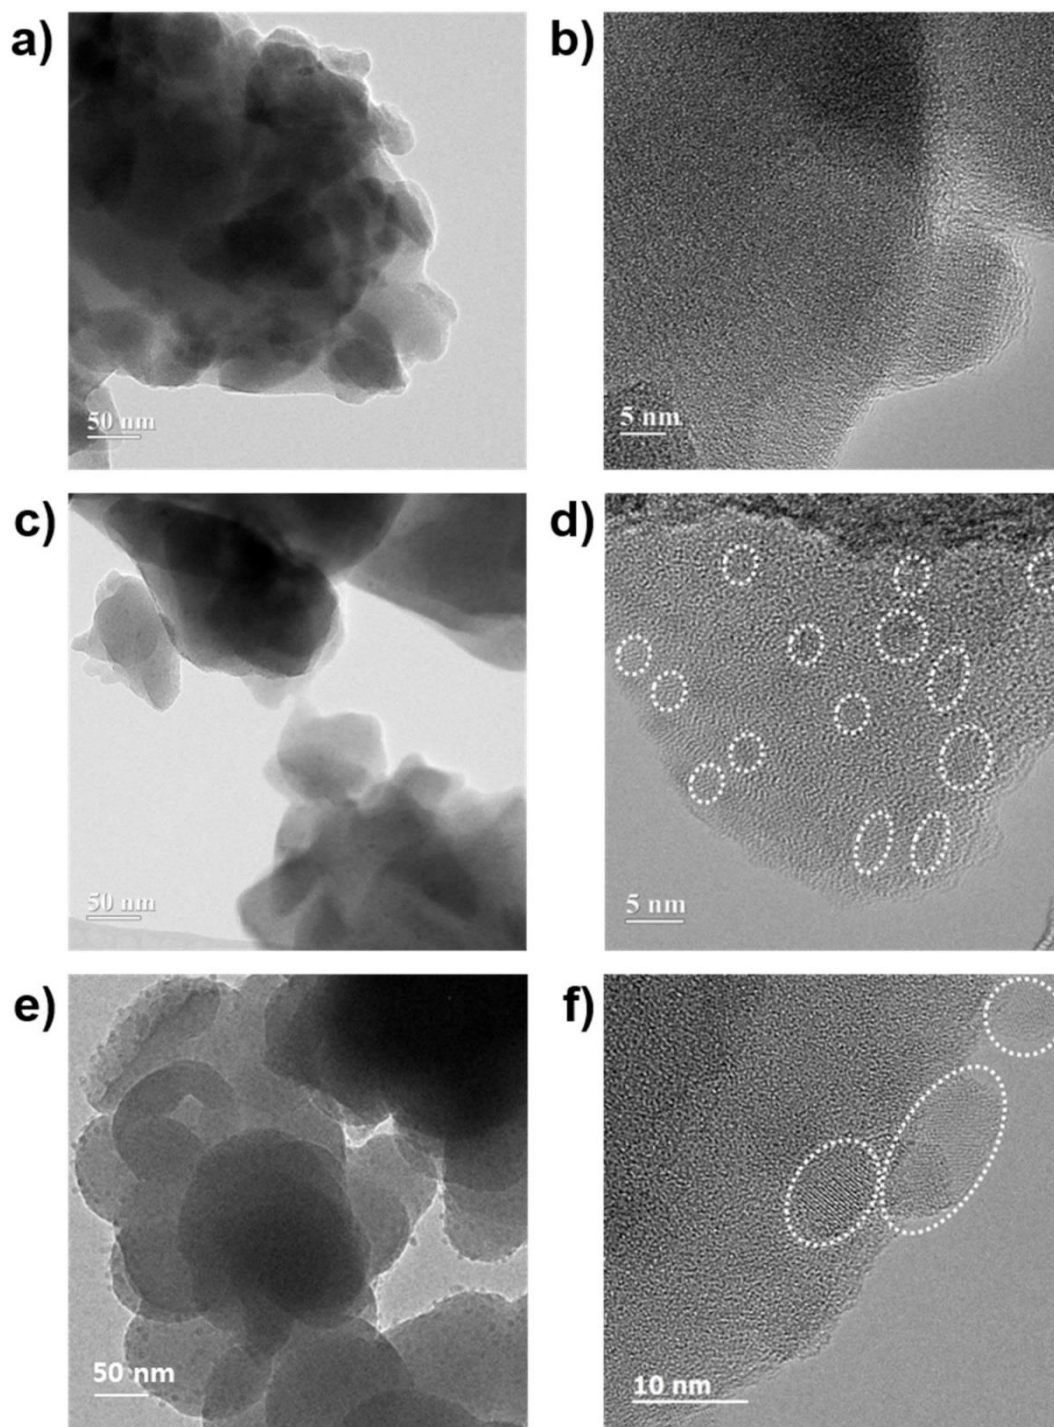

**Fig. S3** TEM and HRTEM images of the (a,b) m-SiO, (c,d) heated m-SiO, and (e,f) Si/SiO<sub>x</sub> nanospheres.

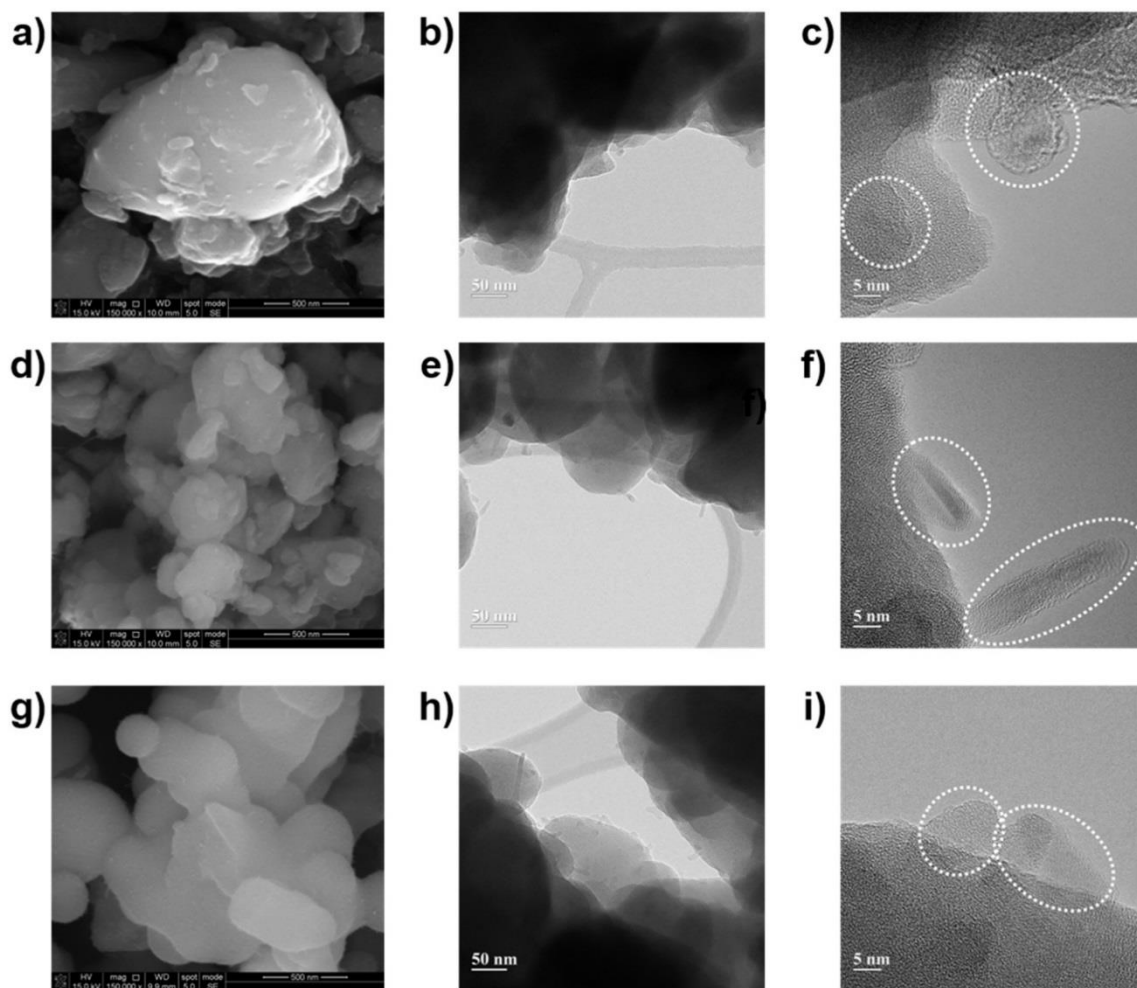

**Fig. S4** (a) FESEM, (b) TEM, (c) HRTEM images of Si/SiO<sub>x</sub>-SiO-16 composites, (d) FESEM, (e) TEM, (f) HRTEM images of Si/SiO<sub>x</sub>-SiO-8 composites, and (g) FESEM, (h) TEM, (i) HRTEM images of Si/SiO<sub>x</sub>-SiO-2 composites.

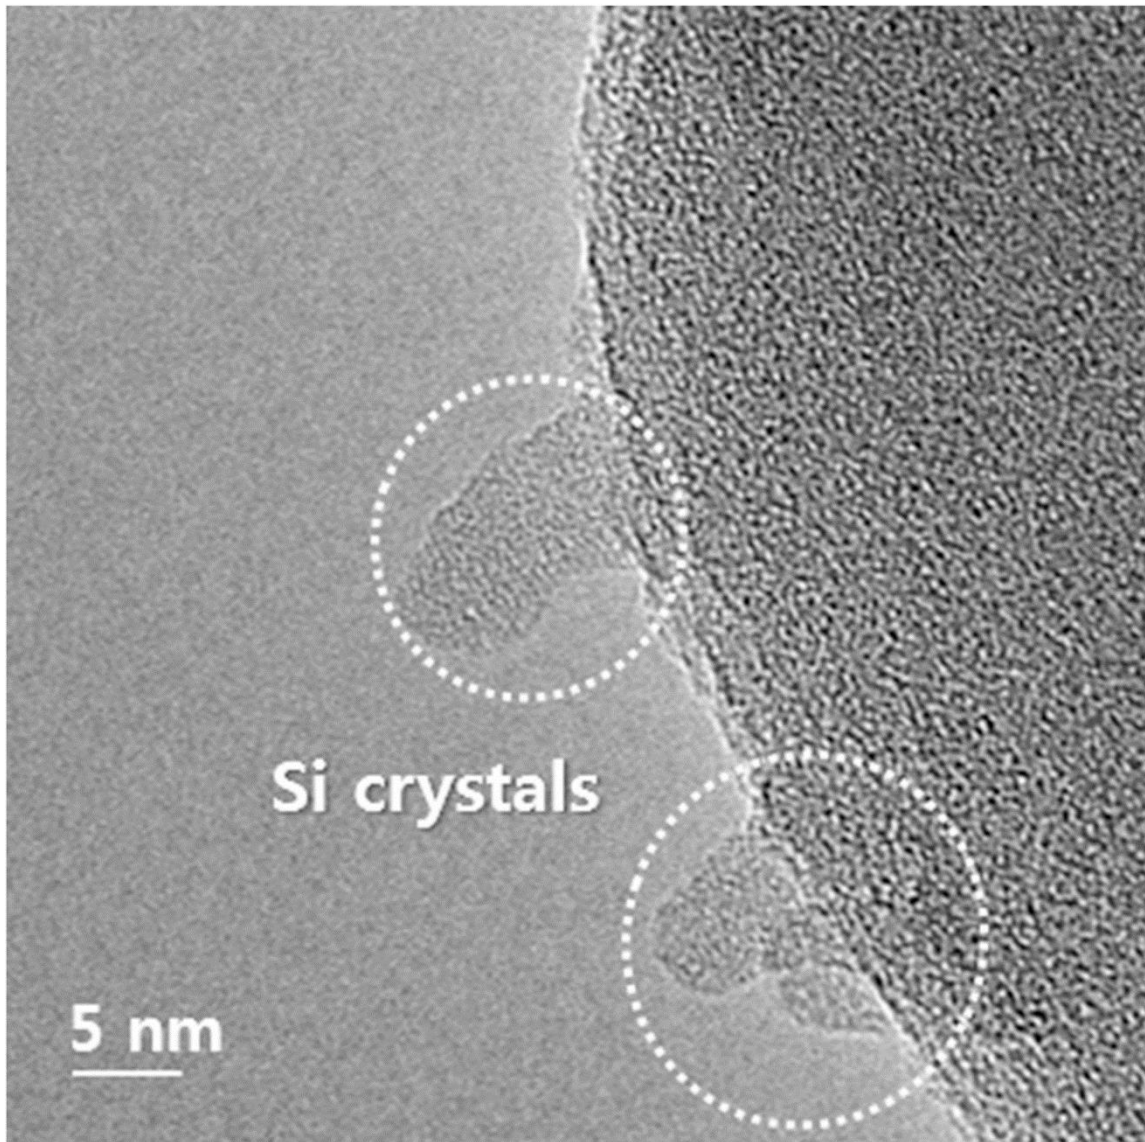

**Fig. S5** HRTEM images of Si/SiO<sub>x</sub>-SiO-4 composites.

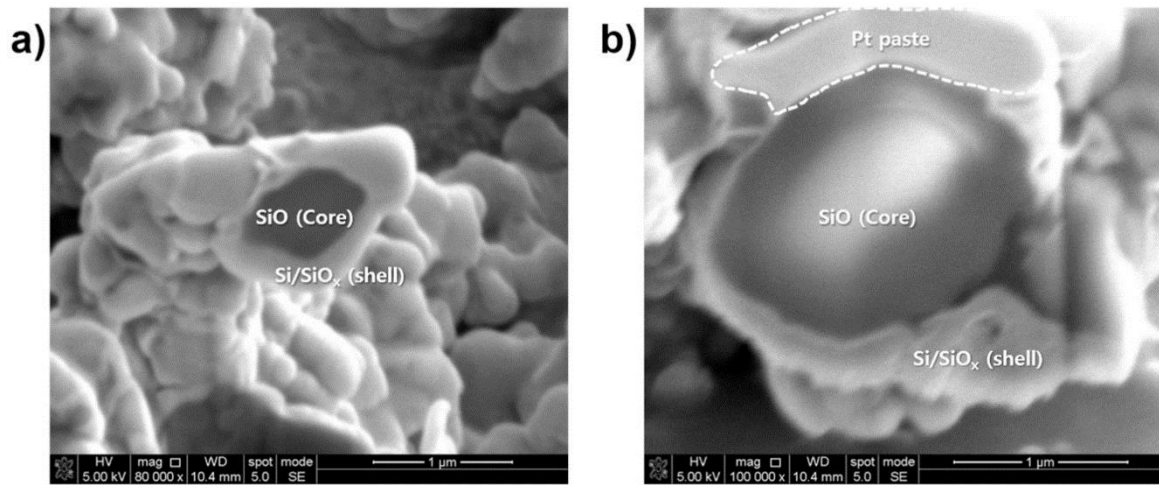

**Fig. S6** FESEM images of Si/SiO<sub>x</sub>-SiO-4 composites after milling using focused ion beam technique.

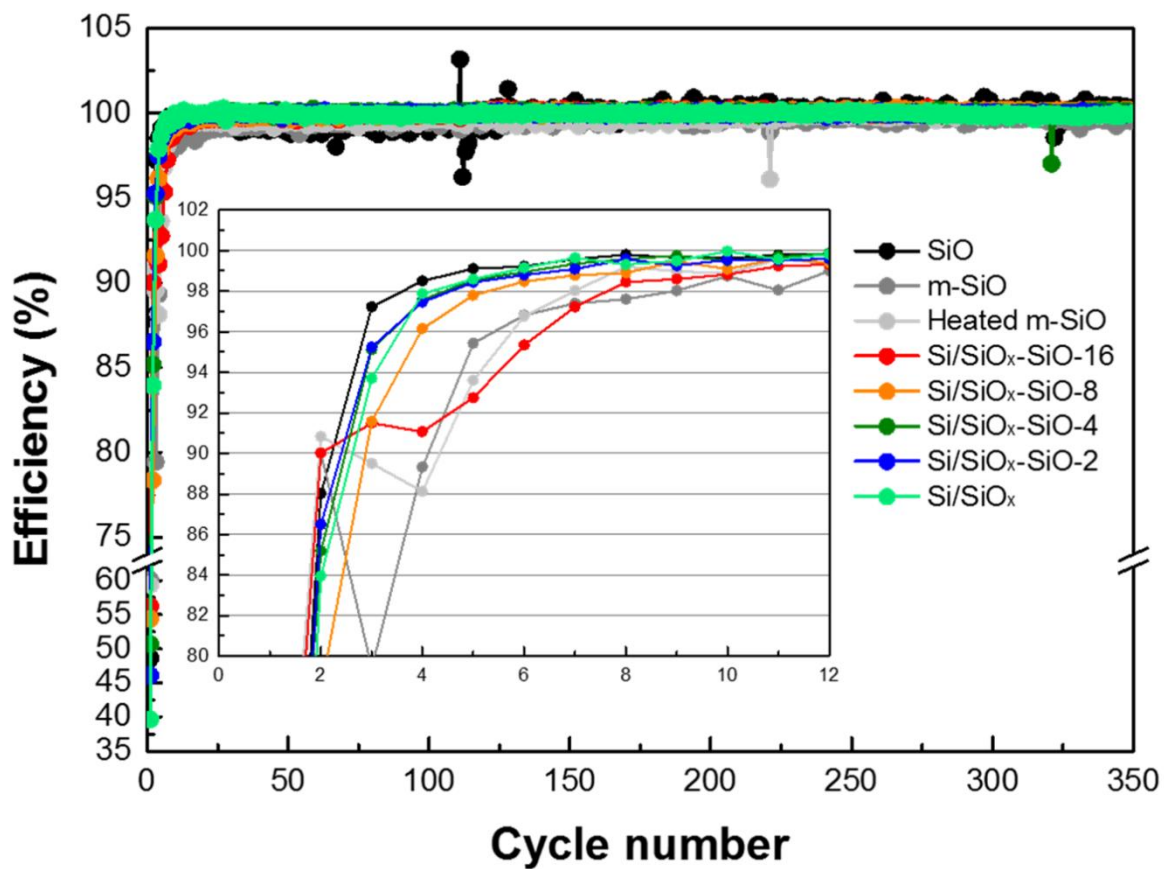

**Fig. S7** Coulombic efficiencies of the Si/SiO<sub>x</sub>-SiO composite anodes at a constant current of 0.2 C (200 mA g<sup>-1</sup>) for 350 cycles.



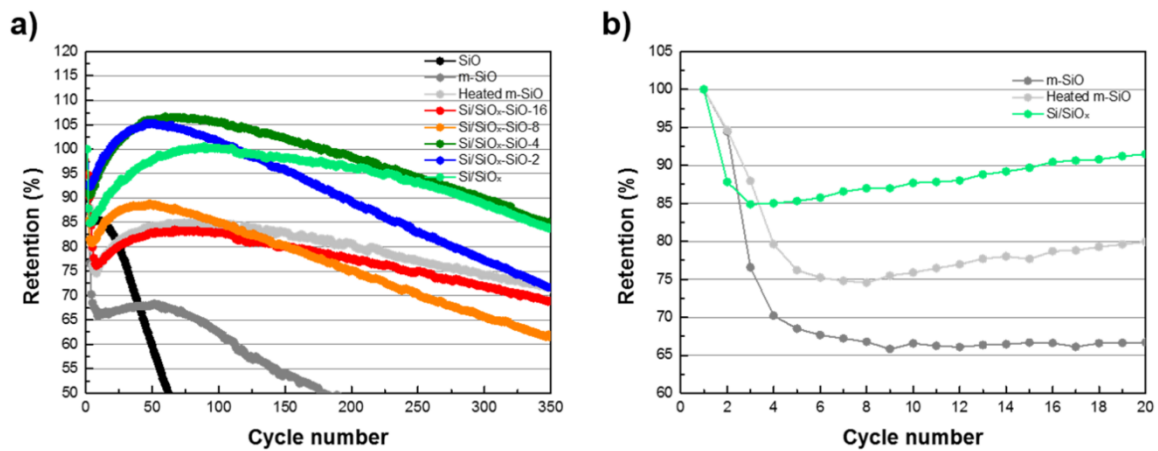

**Fig. S8.** Discharge capacity retentions of the Si/SiO<sub>x</sub>-SiO composite anodes at a constant current of 0.2 C (200 mA g<sup>-1</sup>) for (a) 350 cycles, and (b) 20 cycles.

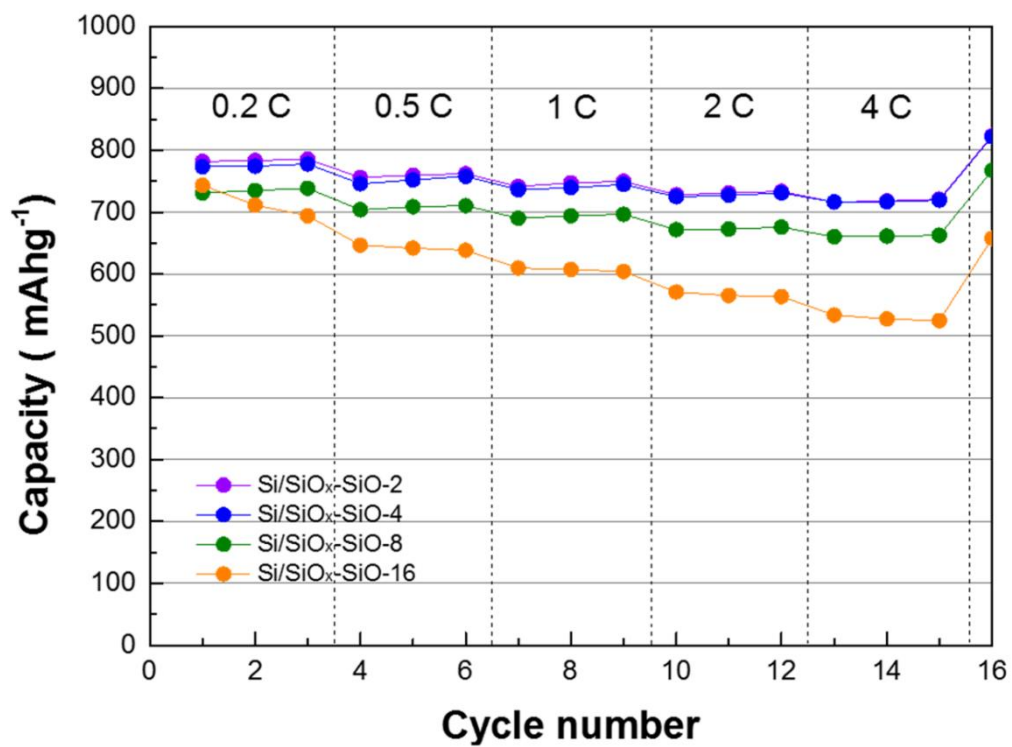

**Fig. S9** Rate-capability of Si/SiO<sub>x</sub>-SiO composite anodes at different current densities of 0.1, 0.2, 0.5, 1.0, 2.0, and 4.0 C (1C = 1000 mA g<sup>-1</sup>).

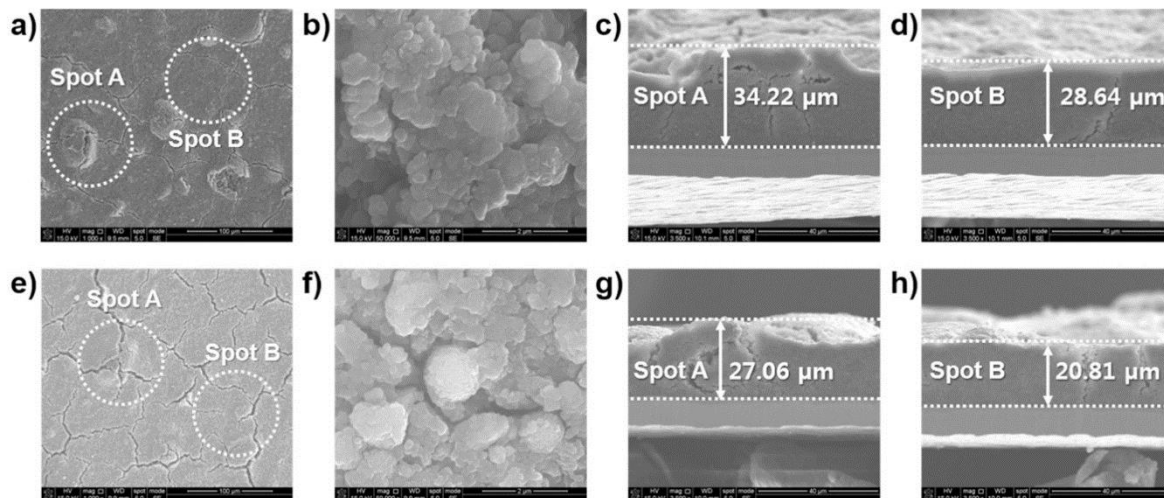

**Fig. S10** (a,b) Top view and (c,d) cross-sectional FESEM images of the heated m-SiO electrodes at 1st charge states, (e,f) top view and (g,h) cross-sectional FESEM images of the heated m-SiO electrodes at 1st discharge states.

**Table S1** Electrochemical performances and electrode information of SiO-based anode materials.

| Number | Anode materials               | Mass loading (mg/cm <sup>2</sup> ) | Current density (mA/g)  | Discharge Capacity (mAh/g) | Cycles | Reference number |
|--------|-------------------------------|------------------------------------|-------------------------|----------------------------|--------|------------------|
| 1      | Si/SiO <sub>x</sub> -SiO      | 1.5                                | 200                     | 966                        | 350    | This work        |
| 2      | Etched m-SiO                  | -                                  | 150                     | 2366                       | 50     | [14]             |
| 3      | Si-SiO-SiO <sub>2</sub>       | 3                                  | ~100                    | 1670                       | 100    | [15]             |
| 4      | SiO@F-doped C                 | 1.5~1.7                            | 100                     | 1518                       | 350    | [17]             |
| 5      | Si/SiO                        | -                                  | 0.2 mA cm <sup>-2</sup> | 827                        | 20     | [18]             |
| 6      | SiO <sub>x</sub> /Si/C        | -                                  | 100, 300                | 2209                       | 100    | [19]             |
| 7      | SiO/Graphite/C                | 2                                  | 100, 200                | 905                        | 55     | [20]             |
| 8      | SiO/rGO                       | -                                  | 120                     | ~1250                      | 50     | [22]             |
| 9      | SiO@CNFs/Graphite             | -                                  | 100                     | 1032                       | 100    | [23]             |
| 10     | SiO <sub>x</sub> -C           | -                                  | 45                      | 450                        | 100    | [24]             |
| 11     | TiO <sub>2</sub> -coated SiO  | 2~3                                | 60, 120                 | 1265                       | 50     | [26]             |
| 12     | Ag-coated porous SiO          | 10                                 | 130~220                 | 1350                       | 50     | [28]             |
| 13     | Si/SiO <sub>x</sub> nanowires | 5                                  | 130                     | 1290                       | 50     | [29]             |
| 14     | Porous SiO <sub>x</sub>       | -                                  | 150~300                 | 1242                       | 100    | [30]             |
| 15     | SiO <sub>x</sub> /C           | 3.5                                | 130~325                 | 645                        | 500    | [31]             |
| 16     | 2D-Si/SiO <sub>x</sub>        | 1.5                                | 1000                    | 740                        | 200    | [32]             |
| 17     | Mesoporous SiO <sub>x</sub>   | 1.5                                | 200                     | 730                        | 100    | [33]             |
